# Supplementary material for: Impact of Resistance Therapy on Motor Function in Children with Cerebral Palsy: A Systematic Review and Meta-Analysis
Source: MDPI journal article supplement (doi:10.3390/ijerph16224513), 2019-11-15
Supplement: s1 [file s1]

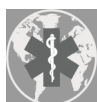

# Supplementary Materials: Impact of Resistance Therapy on Motor Function in Children with Cerebral Palsy: A Systematic Review and Meta-Analysis

Luisa Collado-Garrido <sup>1</sup>, Paula Parás-Bravo <sup>2,3,\*</sup>, Pilar Calvo-Martín <sup>1</sup> and Miguel Santibáñez-Margüello <sup>2,3,4</sup>

<sup>1</sup> Rehabilitation Service, The Marqués de Valdecilla University Hospital, Valdecilla Avenue s/n. C.P.: 39008 Santander, Cantabria, Spain; luisacolladogarrido@yahoo.es (L.C.-G.); mpilar.calvo@scsalud.es (P.C.-M.)

<sup>2</sup> Faculty of Nursing, University of Cantabria, Valdecilla Avenue s/n., 39008 Santander, Cantabria, Spain; paula.paras@unican.es (P.P.-B.); miguel.santibanez@unican.es (M. S.-M.).

<sup>3</sup> Research Nursing Group IDIVAL; Cardenal Herrera Oria Street s/n. C.P., 3901 Cantabria, Spain; paula.paras@unican.es (P.P.-B.).

<sup>4</sup> Global Health Research Group, University of Cantabria, 39008 Santander, Cantabria, Spain; miguel.santibanez@unican.es (M. S.-M.)

\* Correspondence: paula.paras@unican.es

**Table S1.** Global heterogeneity in the intervened group with resisted therapy, according to the complete duration of the therapy. All measurements and follow-ups.

| Intervention group<br>Duration of the therapy | N determinations | Heterogeneity |    |                       |                    |                |       |
|-----------------------------------------------|------------------|---------------|----|-----------------------|--------------------|----------------|-------|
|                                               |                  | Q             | df | p (Chi <sup>2</sup> ) | I <sup>2</sup> (%) | τ <sup>2</sup> | τ     |
| All measurements and follow-ups               | 33               | 79.636        | 32 | 0.000                 | 59.817             | 0.214          | 0.462 |
| <6 weeks                                      | 21               | 60.868        | 20 | 0.000                 | 67.142             | 0.373          | 0.611 |
| 7–12 weeks                                    | 12               | 5.753         | 11 | 0.889                 | 0.000              | 0.000          | 0.000 |

**Table S2.** Global heterogeneity in the intervened group with resisted therapy, according to the number of sessions. All measurements and follow-ups.

| Intervention group<br>Number of sessions | N determinations | Heterogeneity |    |                       |                    |                |       |
|------------------------------------------|------------------|---------------|----|-----------------------|--------------------|----------------|-------|
|                                          |                  | Q             | df | p (Chi <sup>2</sup> ) | I <sup>2</sup> (%) | τ <sup>2</sup> | τ     |
| All measurements and follow-ups          | 32               | 79.636        | 31 | 0.000                 | 59.817             | 0.214          | 0.462 |
| <3 sessions                              | 8                | 32.783        | 7  | 0.000                 | 78.648             | 1.343          | 1.159 |
| 3 sessions                               | 25               | 24.912        | 24 | 0.411                 | 3.660              | 0.005          | 0.068 |

**Table S3.** Global heterogeneity in the group intervened with resisted therapy, according to the duration of the session. All measurements and follow-ups.

| Intervention group<br>Duration of session | N determinations | Heterogeneity |    |                       |                    |                |       |
|-------------------------------------------|------------------|---------------|----|-----------------------|--------------------|----------------|-------|
|                                           |                  | Q             | df | p (Chi <sup>2</sup> ) | I <sup>2</sup> (%) | τ <sup>2</sup> | τ     |
| All measurements and follow-ups           | 29               | 78.966        | 28 | 0.000                 | 64.542             | 0.244          | 0.494 |

|                |    |        |    |       |        |       |       |
|----------------|----|--------|----|-------|--------|-------|-------|
| < 30 minutes   | 11 | 48.016 | 10 | 0.000 | 79.174 | 0.651 | 0.807 |
| 30- 60 minutes | 14 | 7.474  | 13 | 0.876 | 0.000  | 0.000 | 0.000 |
| 60 -90 minutes | 4  | 8.251  | 3  | 0.041 | 63.642 | 0.319 | 0.565 |

**Table S4.** Global heterogeneity in the intervened group with resisted therapy, according to the intervention protocol. All measurements and follow-ups.

| Intervention group<br>Intervention protocol | N determinations | Heterogeneity |    |                       |                    |                |       |
|---------------------------------------------|------------------|---------------|----|-----------------------|--------------------|----------------|-------|
|                                             |                  | Q             | df | p (Chi <sup>2</sup> ) | I <sup>2</sup> (%) | τ <sup>2</sup> | τ     |
| All measurements and follow-ups             | 33               | 79.636        | 32 | 0.000                 | 59.817             | 0.214          | 0.462 |
| Progressive Strength Training               | 16               | 22.118        | 15 | 0.105                 | 32.183             | 0.048          | 0.220 |
| Table of Resisted Exercises                 | 6                | 1.854         | 5  | 0.869                 | 0.000              | 0.000          | 0.000 |
| Functional training                         | 10               | 43.652        | 9  | 0.000                 | 79.382             | 1.255          | 1.120 |
| Static bicycle                              | 1                | 0.000         | 0  | 1.000                 | 0.000              | 0.000          | 0.000 |

**Table S5.** Global heterogeneity in the group intervened with resisted therapy. Analysis of subgroups, according to the methodological quality All measurements and follow-ups.

| Intervention group<br>Methodological quality | N determinations | Heterogeneity |    |                       |                    |                |       |
|----------------------------------------------|------------------|---------------|----|-----------------------|--------------------|----------------|-------|
|                                              |                  | Q             | df | p (Chi <sup>2</sup> ) | I <sup>2</sup> (%) | τ <sup>2</sup> | τ     |
| All measurements and follow-ups              | 33               | 79.636        | 32 | 0.000                 | 59.817             | 0.214          | 0.462 |
| Excelent                                     | 4                | 0.131         | 3  | 0.988                 | 0.000              | 0.000          | 0.000 |
| Godd                                         | 21               | 66.109        | 20 | 0.000                 | 69.747             | 0.333          | 0.577 |
| Fair                                         | 5                | 10.443        | 4  | 0.034                 | 61.697             | 0.302          | 0.550 |
| Po                                           | 3                | 0.265         | 2  | 0.876                 | 0.000              | 0.000          | 0.000 |

**Table S6.** Global heterogeneity in the control group. Analysis of subgroups, according to the therapy used. All measurements and follow-ups.

| Control group                                  | N determinations | Heterogeneity |    |                       |                    |                |      |
|------------------------------------------------|------------------|---------------|----|-----------------------|--------------------|----------------|------|
|                                                |                  | Q             | df | p (Chi <sup>2</sup> ) | I <sup>2</sup> (%) | τ <sup>2</sup> | τ    |
| All studies                                    | 26               | 9.23          | 25 | 0.998                 | 0.00               | 0.00           | 0.00 |
| Conventional therapy used in the control group | 21               | 2.07          | 20 | 1.000                 | 0.00               | 0.00           | 0.00 |
| No therapy used in the control group           | 5                | 4.07          | 4  | 0.396                 | 1.77               | 0.00           | 0.06 |

# Meta Analysis

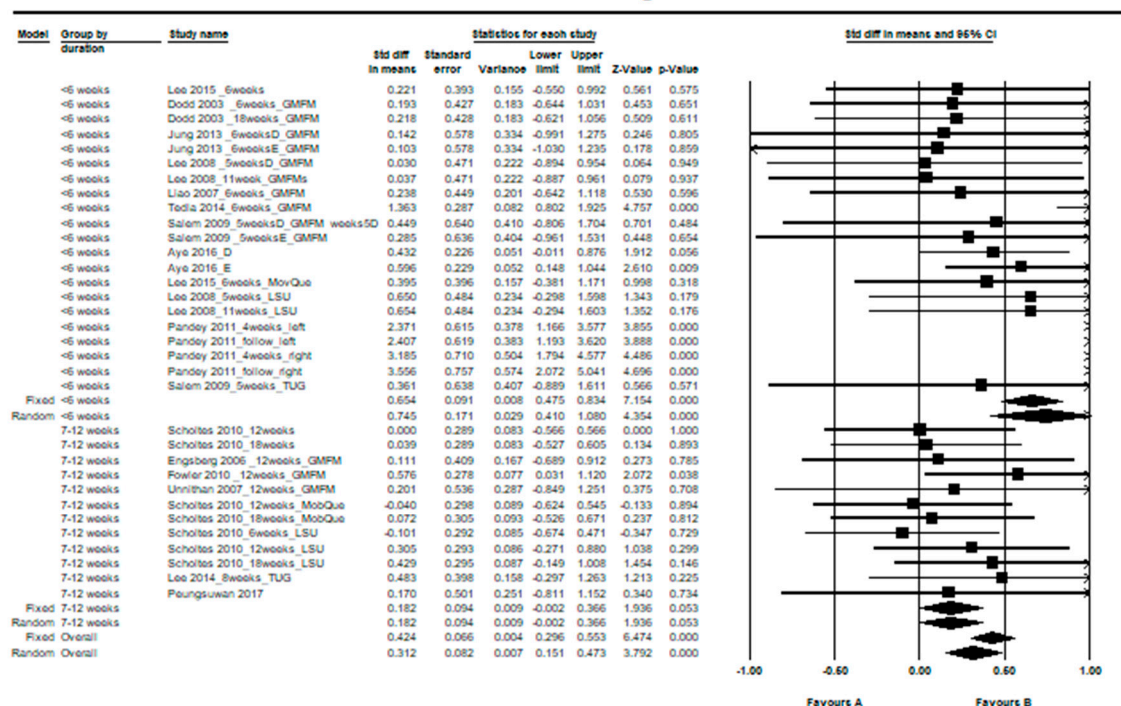

## Meta Analysis

**Figure S1.** Pre-post intra-group difference in the intervened group with resistance therapy. Analysis of subgroups according to the complete duration of the therapy. All measurements and follow-ups.

# Meta Analysis

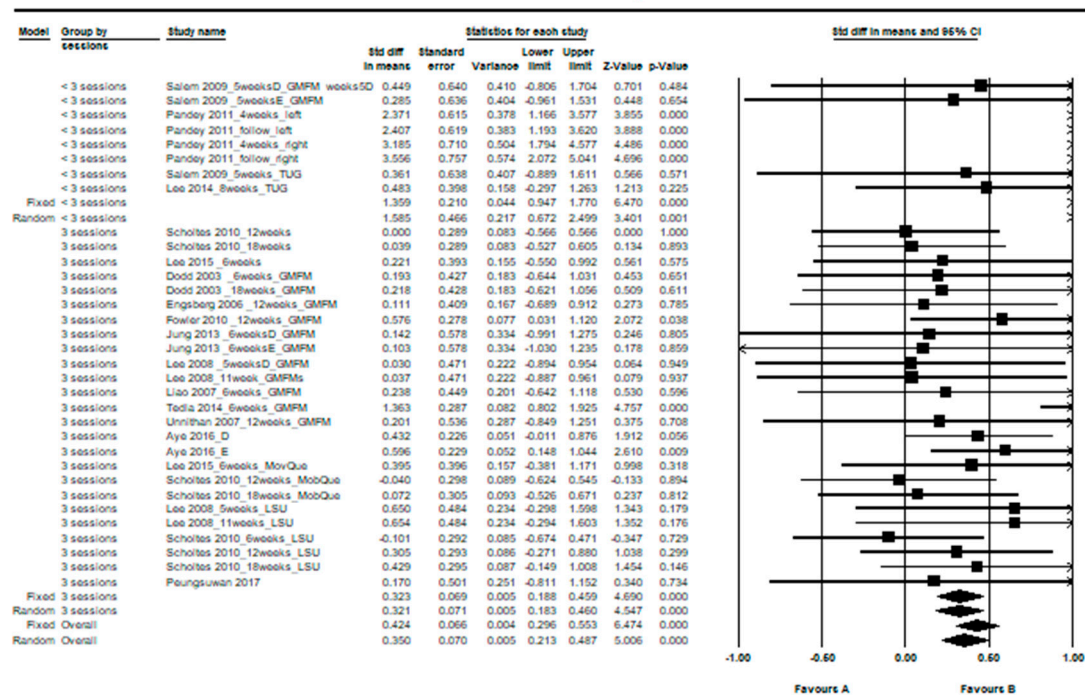

Meta Analysis

**Figure S2.** Pre-post intra-group difference in the intervened group with resistance therapy. Analysis of subgroups according to the number of sessions. All measurements and follow-ups.

# Meta Analysis

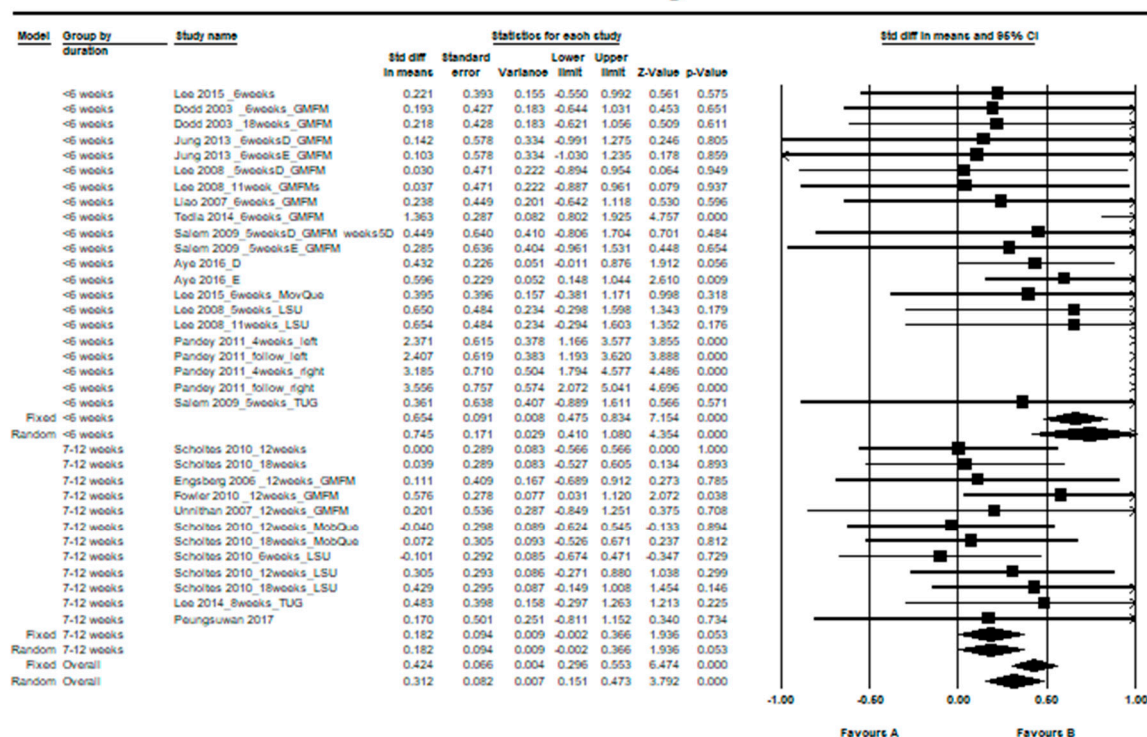

## Meta Analysis

**Figure S3.** Pre-post intra-group difference in the intervened group with resistance therapy. Analysis of subgroups according to the duration of the session. All measurements and follow-ups.

# Meta Analysis

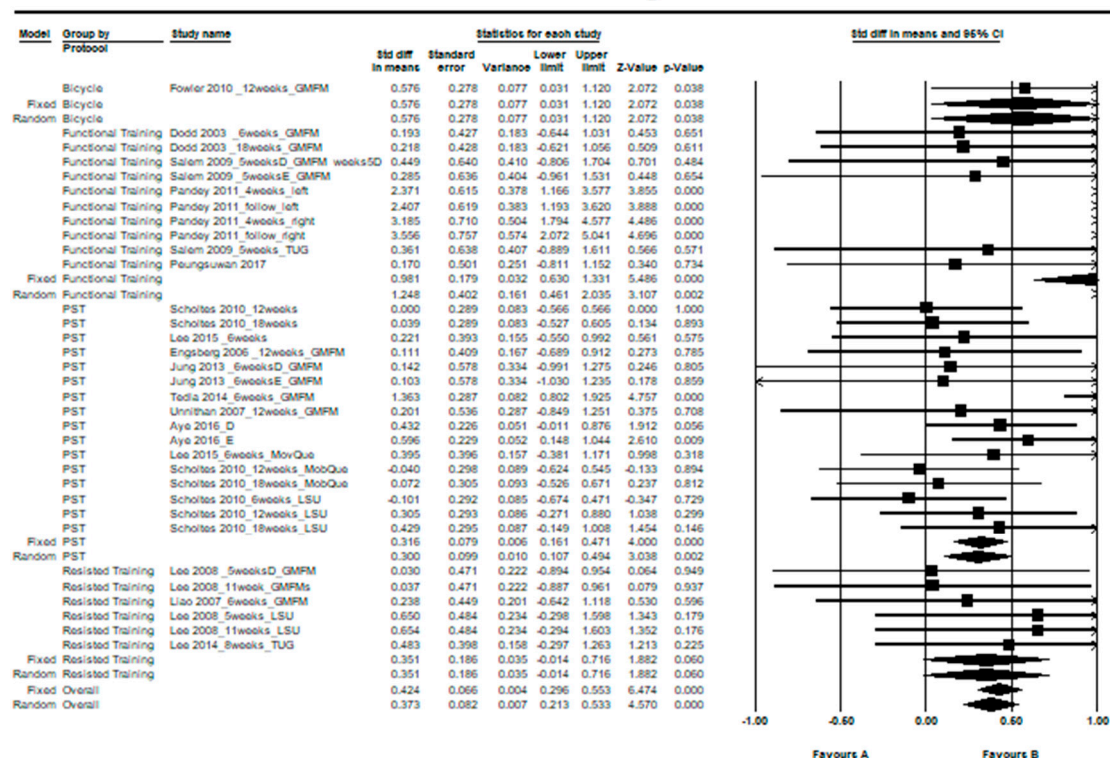

## Meta Analysis

**Figure S4.** Pre-post intra-group difference in the intervened group with resistance therapy. Analysis of subgroups according to the the intervention protocol. All measurements and follow-ups.



## Meta Analysis

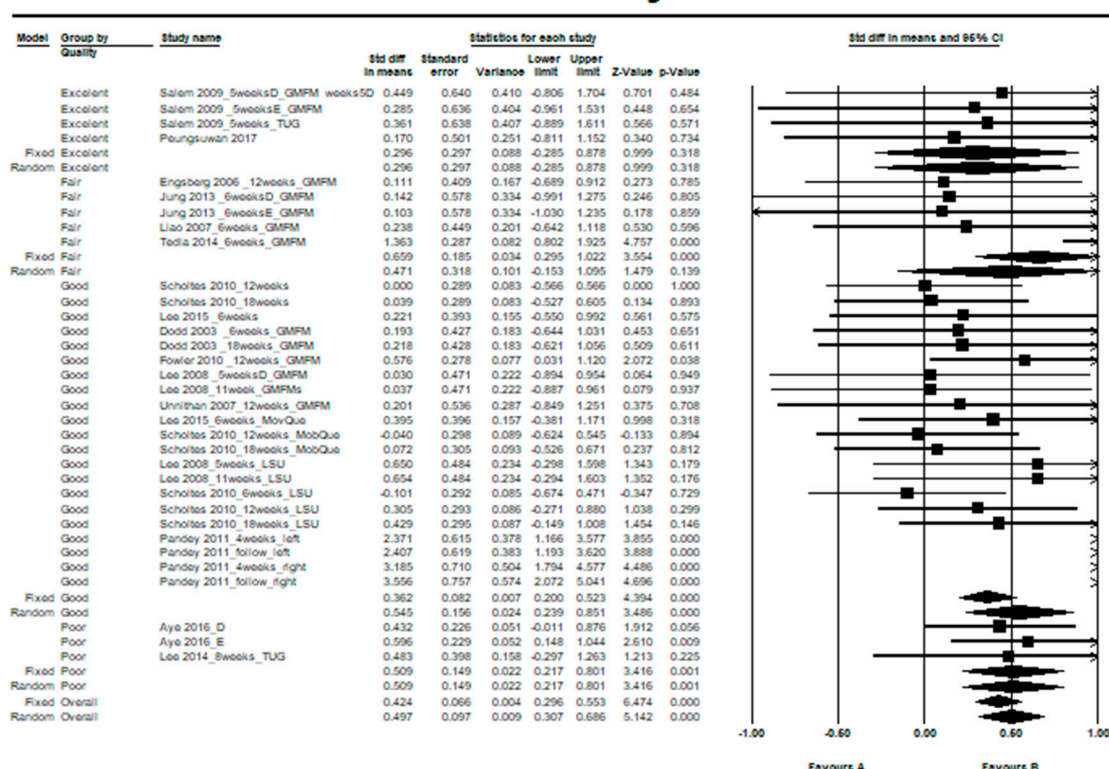

### Meta Analysis

**Figure S5.** Pre-post intra-group difference in the intervened group with resistance therapy. Analysis of subgroups according to the methodological quality. All measurements and follow-ups.

## Meta Analysis

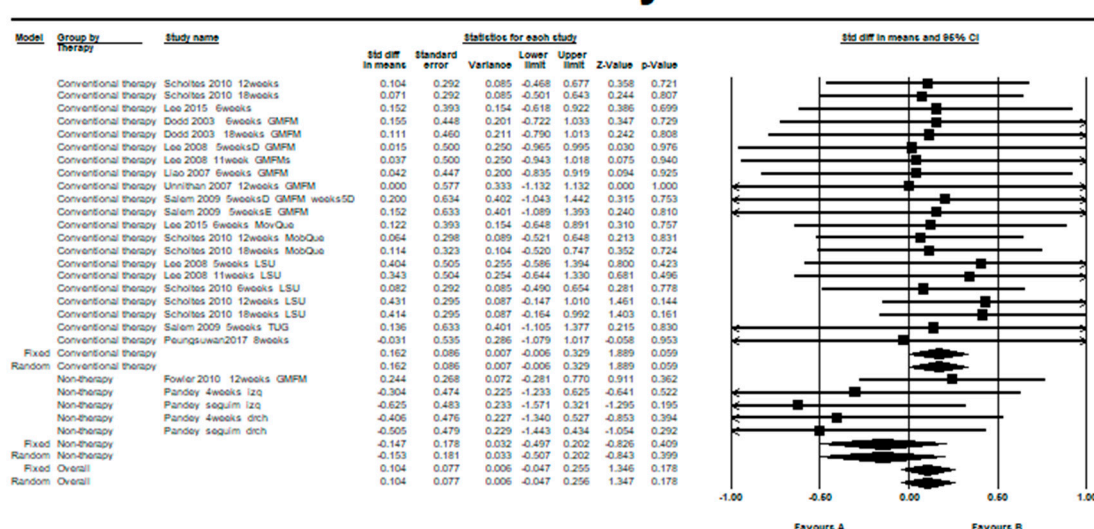

### Meta Analysis

**Figure S6.** Pre-post intra-group difference in the control group. Analysis of subgroups according to the therapy used. All measurements and follow-ups.
